## PERSPECTIVAS

### EDITORIALES

- 1027 La psicosis más allá de la delección de 22q11.2: ¿Juegan algún papel los factores genéticos adicionales?**  
*Fernando S. Goes, M.D., Akira Sawa, M.D.*
- 1030 Efectos a largo plazo de la psicosis: Seguimiento naturalista después de la hospitalización inicial**  
*Nina R. Schooler, Ph.D.*
- 1032 Tratamiento del trastorno bipolar en las personas mayores**  
*David L. Dunner, M.D., F.A.C.Psych.*
- 1034 Un comentario sobre si la vulnerabilidad para el trastorno por consumo de alcohol se asocia con la tasa de consumo de alcohol**  
*Ismene L. Petrakis, M.D.*

### TRATAMIENTO EN PSIQUIATRÍA

- 1036 Variación del número de copias en formas sindrómicas de la enfermedad psiquiátrica: El valor emergente de las pruebas genéticas en psiquiatría**  
*Christian G. Bouwkamp, Ph.D., et al.* EDITORIAL • EMC • AUDIO • GUÍAS CLÍNICAS

### PERSPECTIVAS EN SALUD MENTAL GLOBAL

- 1051 La depresión de tipo moderno como un trastorno de "adaptación" en Japón: la intersección histórica de la sociedad colectivista al encuentro de un sistema individualista basado en el desempeño**  
*Takahiro A. Kato, M.D., Ph.D., Shigenobu Kanba, M.D., Ph.D.* GUÍAS CLÍNICAS

## NUEVAS INVESTIGACIONES

### ARTÍCULOS

- 1054 Raras variaciones en el número de copias del genoma completo y expresión de la esquizofrenia en el síndrome de delección de 22q11.2**  
*Anne S. Bassett, M.D., et al.* EDITORIAL
- 1064 Curso del declinar clínico de los trastornos psicóticos a lo largo de las dos décadas después de la primera hospitalización: Evidencia del Proyecto de Salud Mental de Suffolk County**  
*Roman Kotov, Ph.D., et al.* EDITORIAL • AUDIO • VIDEO • GUÍAS CLÍNICAS
- 1075 Las trayectorias longitudinales a 20 años del funcionamiento social en individuos con trastornos psicóticos**  
*Eva Velthorst, Ph.D., et al.* EDITORIAL • EMC • AUDIO • GUÍAS CLÍNICAS
- 1086 GERI-BD: Un ensayo doble ciego y aleatorizado de litio y divalproato en el tratamiento de la manía en pacientes de edad avanzada con trastorno bipolar**  
*Robert C. Young, M.D., et al.* EDITORIAL • AUDIO • GUÍAS CLÍNICAS
- 1094 Vulnerabilidad para el trastorno por consumo de alcohol y tasa de consumo de alcohol**  
*Joshua L. Gowin, Ph.D., et al.* EDITORIAL • EMC • AUDIO • VIDEO • GUÍAS CLÍNICAS
- 1102 Conectividad estructural reducida en los tractos fronto-estriatales de materia blanca en el bucle asociativo en esquizofrenia**  
*James J. Levitt, M.D., et al.*
- 1112 Conectividad funcional del estriado ventral como predictor del trastorno depresivo en adolescentes en una muestra longitudinal basada en la comunidad**  
*Pedro Mario Pan, M.D., et al.*

**CARTAS AL EDITOR**

- 1120 El peligro del marco de dos sistemas de LeDoux y Pine**  
*Michael S. Fanselow, Ph.D., Zachary T. Pennington, M.A.*
- 1121 Elevando el papel de la experiencia subjetiva en la clínica: Respuesta a Fanselow y Pennington**  
*Daniel S. Pine, M.D., Joseph E. LeDoux, Ph.D.*
- 1122 Equivalencia de la terapia psicodinámica con otros tratamientos establecidos: Apoyo limitado de la evidencia e importancia clínica**  
*Ioana A. Cristea, Ph.D., et al.*
- 1123 ¿Diferentes estándares al evaluar la evidencia de la terapia psicodinámica? Respuesta a Cristea et al.**  
*Christiane Steinert, Ph.D., et al.*

**RESEÑAS BIBLIOGRÁFICAS**

- 1125 Integrating Behavioral Health and Primary Care [Integrando Problemas del Comportamiento y Atención Primaria]**  
*Rachel B. Katz, M.D., Benjamin M. Cherry, M.D.*
- 1126 Telepsychiatry and Health Technologies: A Guide for Mental Health Professionals [Telepsiquiatría y tecnologías de la salud: Una guía para profesionales de la salud mental]**  
*Frank W. Brown, M.D., M.B.A.*

**OTROS TEMAS DE INTERÉS**

**1127 Educación Médica Continuada**

**Cubierta:** [Autumn leaves at Belmont Lake State Park in Babylon, New York, part of Suffolk County. Two studies in this issue provide long-term data on clinical course (Kotov et al., p. 1064) and social functioning (Velthorst et al., p. 1075) in a cohort of first-admission patients with psychosis from Suffolk County followed over 20 years. (Image by Joe Trentacosti, Shutterstock.com)]

Article content that addresses **Core Competencies**, defined by the Accreditation Council of Graduate Medical Education and the American Board of Medical Specialties, is indicated by the following symbols:

-  Professionalism
-  Patient Care and Procedural Skills
-  Medical Knowledge
-  Practice-Based Learning and Improvement
-  Interpersonal and Communication Skills
-  Systems-Based Practice.

More information is available at [www.abms.org/board-certification/a-trusted-credential/based-on-core-competencies/](http://www.abms.org/board-certification/a-trusted-credential/based-on-core-competencies/)

- AUDIO** Highlighted in AJP Audio, a downloadable .mp3 file available at [ajp.psychiatryonline.org](http://ajp.psychiatryonline.org)
- EMC** A course covering the content of this article is available online for paid subscribers to the AJP EMC Course program
- EDITORIAL** Discussed in one of the issue's editorials
- GUÍAS CLÍNICAS** Guías clínicas provided on the English table of contents
- VIDEO** Highlighted online by Deputy Editor Daniel S. Pine, M.D.

**La Tabla de Contenidos y resúmenes de Este Número Está Disponible en Español**

*(This issue's Table of Contents and abstracts are available in Spanish)*

Translation presented in collaboration with the Office of Global Health, Rutgers-Robert Wood Johnson Medical School

Support for this effort provided by ACTA Colombia.

**Translation courtesy of**

- Sergi Casals, M.A.**, Garuna, Medellín, Colombia ([www.garunaeditors.com](http://www.garunaeditors.com))
- Carlos Lopez Jaramillo, M.D.**, Universidad de Antioquia, Medellín, Colombia
- Javier I. Escobar, M.D., M.Sc.**, Rutgers-Robert Wood Johnson Medical School

## Raras variaciones en el número de copias del genoma completo y expresión de la esquizofrenia en el síndrome de delección de 22q11.2

Anne S. Bassett, M.D., Chelsea Lowther, B.Sc., Daniele Merico, Ph.D., Gregory Costain, M.D., Ph.D., Eva W. C. Chow, M.D., Therese van Amelsvoort, M.D., Ph.D., Donna McDonald-McGinn, M.Sc., Raquel E. Gur, M.D., Ph.D., Ann Swillen, Ph.D., Marianne Van den Bree, Ph.D., Kieran Murphy, M.D., Ph.D., Doron Gothelf, M.D., Carrie E. Bearden, Ph.D., Stephan Eliez, M.D., Wendy Kates, Ph.D., Nicole Philip, M.D., Vandana Sashi, M.D., Linda Campbell, Ph.D., Jacob Vorstman, M.D., Ph.D., Joseph Cubells, M.D., Ph.D., Gabriela M. Repetto, M.D., Tony Simon, Ph.D., Erik Boot, M.D., Ph.D., Tracy Heung, M.A., Rens Evers, M.D., Ph.D., Claudia Vingerhoets, M.Sc., Esther van Duin, M.Sc., Elaine Zackai, M.D., Elfi Vergaelen, M.Sc., Koen Devriendt, M.D., Joris R. Vermeesch, Ph.D., Michael Owen, M.D., Ph.D., Clodagh Murphy, Ph.D., Elena Michaelovosky, Ph.D., Leila Kushan, M.Sc., Maude Schneider, M.Sc., Wanda Fremont, M.D., Tiffany Busa, M.D., Stephen Hooper, Ph.D., Kathryn McCabe, Ph.D., Sasja Duijff, Ph.D., Karin Isaev, B.Sc., Giovanna Pellecchia, Ph.D., John Wei, Ph.D., Matthew J. Gazzellone, M.Sc., Stephen W. Scherer, Ph.D., Beverly S. Emanuel, Ph.D., Tingwei Guo, Ph.D., Bernice E. Morrow, Ph.D., Christian R. Marshall, Ph.D., International 22q11.2DS Brain and Behavior Consortium

**Objetivo:** El síndrome de delección del cromosoma 22q11.2 (SD22q11.2) está asociado a un riesgo más de 20 veces mayor de desarrollar esquizofrenia. El objetivo de este estudio fue identificar factores genéticos adicionales (por ejemplo, "golpes secundarios") que pueden contribuir a la expresión de la esquizofrenia.

**Método:** Por medio de un consorcio internacional, los autores obtuvieron muestras de ADN de 329 pacientes fenotipificados psiquiátricamente con SD22q11.2. Utilizando una plataforma de microarray y métodos establecidos para evaluar las variaciones en el número de copias (VNC), los autores compararon la carga del genoma completo de VNC autosomales raras, fuera de la región de delección de 22q11.2, entre dos grupos: un grupo con esquizofrenia y otro de personas sin ningún trastorno psiquiátrico a los  $\geq 25$  años. Los autores evaluaron si los genes solapados por VNC raras estaban sobre-representados en las vías funcionales importantes para la esquizofrenia.

**Resultados:** Las VNC raras que solapan uno o más genes codificadores de proteínas revelaron diferencias significativas

entre los grupos. Para las duplicaciones exónicas raras, seis de los 19 grupos de genes evaluados estaban enriquecidos en el grupo de esquizofrenia; los genes asociados con fenotipos anómalos del sistema nervioso siguieron siendo significativos en un modelo de regresión logística paso a paso y mostraron interacciones significativas con los genes de la región de delección de 22q11.2 en un análisis de conectividad. Para las raras delecciones exónicas, el grupo de esquizofrenia tuvo, en promedio, más genes solapados. Las VNC raras adicionales implicaron sitios (*loci*) y genes de riesgo conocidos (p. ej., GRM7, 15q13.3, 16p12.2) y nuevos.

**Conclusiones:** Las raras VNCs que solapan genes fuera de la región de delección de 22q11.2 contribuyen al riesgo de esquizofrenia en SD22q11.2, de manera que apoyan una hipótesis multigénica para la esquizofrenia. Los hallazgos tienen implicaciones para entender la expresión de la enfermedad psicótica y anuncian la importancia de la secuenciación del genoma completo para apreciar la arquitectura genómica general de la esquizofrenia.

(*Am J Psychiatry* 2017; 174:1054–1063)

## Curso del declinar clínico de los trastornos psicóticos a lo largo de las dos décadas después de la primera hospitalización: Evidencia del Proyecto de Salud Mental de Suffolk County

Roman Kotov, Ph.D., Laura Fochtmann, M.D., M.B.I., Kaiqiao Li, M.S., Marsha Tanenberg-Karant, M.D., Eduardo A. Constantino, M.D., Joan Rubinstein, M.D., Greg Perlman, Ph.D., Eva Velthorst, Ph.D., Anne-Kathrin J. Fett, Ph.D., Gabrielle Carlson, M.D., Evelyn J. Bromet, Ph.D.

**Objetivo:** Kraepelin consideró el curso clínico declinante decreciente como una señal distintiva de la esquizofrenia, pero otros han sugerido que los resultados normalmente se estabilizan o mejoran después del inicio del tratamiento. Los autores investigaron este tema en una cohorte con trastornos psicóticos, definida epidemiológicamente, a la que se hizo seguimiento durante 20 años después de la primera hospitalización.

**Método:** El Proyecto de Salud Mental de Suffolk County reclutó pacientes de primera hospitalización con psicosis de todas las unidades de hospitalización de Suffolk County, Nueva York (tasa de respuesta, 72%). Se evaluó a los participantes personalmente seis veces a lo largo de las dos décadas; 373 completaron el seguimiento de 20 años (68% de sobrevivientes); 175 tenían esquizofrenia/trastorno esquizoafectivo. En cada ocasión se realizó la Evaluación Global del Funcionamiento (GAF, por sus siglas en inglés) y se evaluaron los síntomas psicóticos y los síntomas de estado de ánimo. El mes 6, cuando casi todos los participantes fueron dados de alta de la primera hospitalización, se utilizó como referencia.

**Resultados:** En el grupo de esquizofrenia, las puntuaciones promedio de GAF disminuyeron de 49 en el mes 6 a 36 en el año 20. Los síntomas negativos y positivos también empeoraron (valores *d* de Cohen: 0,45–0,73). Entre los participantes sin esquizofrenia, las puntuaciones GAF fueron más altas inicialmente (una media de aproximadamente 64) pero disminuyeron 9 puntos durante el período de seguimiento. El empeoramiento empezó entre los años 5 y 8. Ni el envejecimiento ni los cambios en el tratamiento con antipsicóticos explicaron las disminuciones de la puntuación. En todos los trastornos, la depresión mejoró y los síntomas maníacos siguieron siendo bajos durante los 20 años.

**Conclusiones:** Los autores encontraron que la carga sintomática substancial de los trastornos, aumentó con el tiempo y que al final puede anular las ganancias iniciales del tratamiento. Estudios anteriores han sugerido que prevenir esta reducción se puede prevenir con mejores modelos de prestación de salud mental. En los Estados Unidos, a menudo no se cubren estas necesidades de atención y abordarlas es una prioridad urgente.

(*Am J Psychiatry* 2017; 174:1064–1074)

# Las trayectorias longitudinales a 20 años del funcionamiento social en individuos con trastornos psicóticos

Eva Velthorst, Ph.D., Anne-Kathrin J. Fett, Ph.D., Avraham Reichenberg, Ph.D., Greg Perlman, Ph.D., Jim van Os, M.D., Ph.D., Evelyn J. Bromet, Ph.D., Roman Kotov, Ph.D.

**Objetivo:** El deterioro social se reconoce desde hace tiempo como un rasgo esencial de la esquizofrenia y es común en otros trastornos psiquiátricos. Sin embargo, hasta la fecha rara vez se han estudiado de forma sistemática las trayectorias a largo plazo del deterioro social en los trastornos psicóticos.

**Método:** Los datos provienen del Proyecto de Salud Mental de Suffolk County, un estudio prospectivo a 20 años, de pacientes hospitalizados por primera vez con trastornos psicóticos. También se evaluó un grupo de comparación de personas que nunca habían tenido trastornos psicóticos. Se aplicó el análisis de crecimiento de clases latentes a datos longitudinales sobre el funcionamiento social de 485 sujetos con trastornos del espectro de la esquizofrenia y trastornos psicóticos del estado de ánimo, y se examinaron las asociaciones de las trayectorias derivadas empíricamente con adaptación social premórbida, diagnóstico y resultados en 20 años.

**Resultados:** El curso de 20 años del funcionamiento social en los diferentes diagnósticos fue descrito por cuatro trayectorias mayoritariamente estables: funcionamiento preservado (N=82; percentil 59 de la distribución de la muestra del grupo de comparación), deterioro moderado (N=148;

percentil 17), con deterioro grave (N=181; percentil 3), y deterioro profundo (N=74; percentil 1). El resultado en el grupo con funcionamiento preservado no difirió, a los 20 años, del de los individuos que nunca habían tenido trastornos psicóticos, pero los otros grupos funcionaron significativamente peor. Las diferencias entre las trayectorias ya eran evidentes en la infancia. Las dos trayectorias de mayor deterioro empezaron a divergir en la adolescencia temprana. Las trayectorias de peor funcionamiento se asociaron fuertemente a otros resultados del mundo-real a los 20 años. Dentro de cada trastorno se representaron múltiples trayectorias. Sin embargo, más participantes con trastornos del espectro de la esquizofrenia tuvieron trayectorias con deterioro, y más con trastornos del ánimo tuvieron trayectorias de mejor funcionamiento.

**Conclusiones:** Los resultados resaltan la variabilidad sustancial de los efectos sociales en los diagnósticos—aunque en general se obtuvieron peores resultados sociales en los trastornos del espectro de la esquizofrenia—y muestran deterioros notablemente estables del funcionamiento social a largo plazo después del inicio de la enfermedad en todos los diagnósticos.

(*Am J Psychiatry* 2017; 174:1075–1085)

## GERI-BD: Un ensayo doble ciego y aleatorizado de litio y divalproato en el tratamiento de la manía en pacientes de edad avanzada con trastorno bipolar

Robert C. Young, M.D., Benoit H. Mulsant, M.D., M.S., Martha Sajatovic, M.D., Ariel G. Gildengers, M.D., Laszlo Gyulai, M.D., Rayan K. Al Jurdi, M.D., John Beyer, M.D., Jovier Evans, Ph.D., Samprit Banerjee, Ph.D., Rebecca Greenberg, M.S., Patricia Marino, Ph.D., Mark E. Kunik, M.D., Peijun Chen, M.D., Ph.D., Marna Barrett, Ph.D., Herbert C. Schulberg, Ph.D., Martha L. Bruce, Ph.D., M.P.H., Charles F. Reynolds III, M.D., George S. Alexopoulos, M.D., for the GERI-BD Study Group

**Objetivo:** Los practicantes clínicos que tratan con estabilizadores del ánimo a los pacientes de edad avanzada con trastorno bipolar, necesitan tener evidencia de ensayos controlados y aleatorizados específicamente por edad. Los autores describen hallazgos de un primer estudio de este tipo de manía en una edad avanzada.

**Método:** Los autores compararon la tolerabilidad y la eficacia del carbonato de litio y el divalproato en 224 pacientes hospitalizados y ambulatorios de 60 años o más con trastorno bipolar I que tuvieran un episodio maniaco, hipomaniaco o mixto. Los participantes fueron asignados de forma aleatoria, bajo las condiciones de un estudio doble ciego, a tratamiento con litio (concentración sérica objetivo: 0,80–0,99 mEq/L) o divalproato (concentración sérica de valproato objetivo: 80–99 µg/mL) por 9 semanas. Los participantes con una respuesta inadecuada después de 3 semanas recibieron risperidona adyuvante abierta. La hipótesis de los autores fue que el divalproato sería mejor tolerado y más eficaz que el litio. La tolerabilidad se evaluó con base en una medida de sedación y en las proporciones de participantes que alcanzaban las concentraciones objetivo. La eficacia se evaluó con la Escala de Evaluación de la Manía de Young (YMRS, por sus siglas en inglés).

**Resultados:** Las tasas de deserción fueron similares para el litio y el divalproato (14% y 18% en la semana 3, y 51% y 44% en la semana 9, respectivamente). Los grupos no difirieron de forma significativa en sedación. Los participantes en el grupo de litio tendieron a tener más temblor. Proporciones similares de participantes en los grupos de litio y divalproato alcanzaron las concentraciones objetivo (57% y 56%, respectivamente). Un modelo longitudinal mixto de mejora (cambio desde la línea de base en la puntuación en la escala YMRS) favoreció el litio (cambio en la puntuación: 390; IC 97,5%=1,71- 6,09). Las tasas de respuesta en nueve semanas no difirieron significativamente entre los grupos de litio y divalproato (79% y 73%, respectivamente). La necesidad de risperidona adyuvante fue baja y similar entre los grupos (17% and 14%, respectivamente).

**Conclusiones:** Tanto el litio como el divalproato fueron eficaces y tolerados adecuadamente; el litio se asoció a una mayor reducción en la puntuación de manía a lo largo de 9 semanas.

(*Am J Psychiatry* 2017; 174:1086–1093)

# Vulnerabilidad para el trastorno por consumo de alcohol y tasa de consumo de alcohol

Joshua L. Gowin, Ph.D., Matthew E. Sloan, M.D., M.Sc., Bethany L. Stangl, Ph.D., Vatsalya Vatsalya, M.D., M.Sc., Vijay A. Ramchandani, Ph.D.

**Objetivo:** Aunque se han identificado varios factores de riesgo para el trastorno por consumo de alcohol, muchos individuos con estos factores no llegan a desarrollar el trastorno. Identificar diferencias fenotípicas tempranas entre individuos vulnerables y controles sanos podría ayudar a identificar los que están en mayor riesgo. El consumo excesivo de alcohol (es decir, cuando se alcanza un nivel de alcohol en la sangre de 80 mg%) conlleva un riesgo de resultados negativos legales y de salud y puede ser un marcador temprano de la vulnerabilidad. Utilizando un paradigma experimental cuidadosamente controlado, los autores evaluaron la hipótesis que los factores de riesgo del trastorno por consumo de alcohol, incluyendo antecedentes familiares de alcoholismo, sexo masculino, impulsividad y poco nivel de respuesta al alcohol, predecirían la tasa de consumo excesivo durante una sesión individual de consumo de alcohol.

**Método:** En este estudio transversal se incluyeron 159 bebedores sociales jóvenes que completaron una sesión de laboratorio en la que se auto-administraron alcohol intravenoso. Se utilizaron modelos de Cox de riesgos proporcionales para

determinar si los factores de riesgo de trastorno por consumo de alcohol estaban asociados a la tasa de alcanzar la exposición al nivel de consumo excesivo.

**Resultados:** Un porcentaje mayor de familiares con alcoholismo (cociente de riesgo: 1,04; IC 95%=1,02–1,07), el sexo masculino (cociente de riesgo: 1,74; IC 95%=1,03 a -2,93), y una mayor impulsividad (cociente de riesgo: 1,17, IC 95%=1,00–1,37) estuvieron asociados a una tasa más alta de consumo excesivo durante la sesión. Los participantes con los tres factores de riesgo tuvieron la tasa más alta de consumo excesivo durante la sesión en comparación con el grupo de menor riesgo (cociente de riesgo: 5,27; IC 95%=1,81–15,30).

**Conclusiones:** El consumo excesivo de alcohol puede ser un indicador temprano de vulnerabilidad al trastorno por consumo de alcohol y debería ser evaluado cuidadosamente como parte de una evaluación clínica exhaustiva.

(*Am J Psychiatry* 2017; 174:1094–1101)

## Conectividad estructural reducida en los tractos fronto-estriatales de la materia blanca en el bucle asociativo en esquizofrenia

James J. Levitt, M.D., Paul G. Nestor, Ph.D., Laura Levin, B.S., Paula Pelavin, PA-C., Pan Lin, Ph.D., Marek Kubicki, M.D., Ph.D., Robert W. McCarley, M.D., Martha E. Shenton, Ph.D., Yogesh Rath, Ph.D.

**Objetivo:** El estriado recibe tractos de materia blanca segregados e integrativos de la corteza facilitando el procesamiento de la información en la red de ganglios córtico-basales. Los autores examinaron ambos tipos de tractos de entrada en el bucle asociativo estriatal en pacientes con esquizofrenia crónica y en controles sanos.

**Método:** Se obtuvieron escanografías de IRM funcional y de difusión en un sistema 3-T de 26 pacientes con esquizofrenia crónica y 26 controles sanos de características similares. Utilizando *FreeSurfer*, se parceló la corteza asociativa en las sub-regiones de corteza prefrontal ventrolateral y corteza prefrontal dorsolateral. El estriado se parceló manualmente en sus subregiones funcionales asociativa y sensoriomotora. La anisotropía fraccional y las vertientes normalizadas, un estimado de los recuentos de fibras, se evaluaron en cuatro tractos fronto-estriatales (estriado de la corteza asociativa prefrontal dorsolateral, estriado de la corteza sensoriomotora prefrontal dorsolateral, estriado de la corteza asociativa prefrontal ventrolateral, estriado de la corteza sensoriomotora prefrontal ventrolateral). Además, estas medidas se correlacionaron con una medida de control cognitivo, el test del trazo (*Trail-Making Test*), Parte B.

**Resultados:** Los resultados mostraron anisotropía fraccional reducida y menos fibras en pacientes con esquizofrenia cró-

nica para los cuatro tractos, tanto segregados como integrativos. Pruebas t post hoc mostraron anisotropía fraccional reducida en el estriado izquierdo de la corteza asociativa prefrontal ventrolateral y en el estriado izquierdo de la corteza sensoriomotora prefrontal ventrolateral, y menos fibras normalizadas en el estriado derecho de la corteza sensoriomotora prefrontal dorsolateral y en el estriado derecho e izquierdo de la corteza sensoriomotora prefrontal ventrolateral en pacientes con esquizofrenia crónica. Además, las fibras normalizadas en el estriado derecho de la corteza sensoriomotora prefrontal dorsolateral estuvieron correlacionadas negativamente con el tiempo dedicado al test del trazo, parte B, en los controles sanos, pero no en los pacientes con esquizofrenia crónica.

**Conclusiones:** Estos hallazgos demostraron que la conectividad estructural es reducida tanto en los tractos integrativos como en los segregados en el bucle asociativo estriatal en esquizofrenia crónica, y que las reducidas fibras normalizadas en el estriado de la corteza sensoriomotora prefrontal dorsolateral del hemisferio derecho predecían peor control cognitivo en sujetos sanos de control, pero no en pacientes con esquizofrenia crónica, lo que sugiere la pérdida de una correlación «normal» entre cerebro y comportamiento en esquizofrenia crónica.

(*Am J Psychiatry* 2017; 174:1102–1111)



# Conectividad funcional del estriado ventral como predictor del trastorno depresivo en adolescentes en una muestra longitudinal basada en la comunidad

Pedro Mario Pan, M.D., João R. Sato, Ph.D., Giovanni A. Salum, M.D., Ph.D., Luis A. Rohde, M.D., Ph.D., Ary Gadelha, M.D., Ph.D., Andre Zugman, M.D., Ph.D., Jair Mari, M.D., Ph.D., Andrea Jackowski, Ph.D., Felipe Picon, M.D., Eurípedes C. Miguel, M.D., Ph.D., Daniel S. Pine, M.D., Ellen Leibenluft, M.D., Rodrigo A. Bressan, M.D., Ph.D., Argyris Stringaris, M.D., Ph.D.

**Objetivo:** Estudios anteriores han implicado el procesamiento de recompensas aberrante en la patogénesis de la depresión en adolescentes. Sin embargo, ningún estudio ha utilizado la conectividad funcional dentro de una red de recompensas distribuidas, evaluada utilizando IRM funcional (IRMf) en estado de reposo, para predecir el inicio de la depresión en adolescentes. Este estudio utilizó conectividad funcional basada en redes de recompensas en la línea de base para predecir trastorno depresivo en el seguimiento en una muestra de la comunidad de adolescentes.

**Método:** Se hizo IRMf en estado de reposo a un total de 637 niños de entre 6 y 12 años. La conectividad funcional intrínseca (CFi) entre los nodos de una red de recompensas putativa se evaluó por medio de análisis de descubrimiento y réplica. Con regresión logística se evaluó si la fuerza de los nodos estriatales, una medida de CFi relacionada con las recompensas, predecía el inicio de un trastorno depresivo al 3 año de seguimiento. Otros análisis investigaron la especificidad de esta predicción.

**Resultados:** La fuerza aumentada del nodo del estriado ventral izquierdo predijo un mayor riesgo de un futuro trastorno depresivo (*odds ratio*=1,54; IC 95%=1,09–2,18), incluso después de excluir los participantes que tenían trastornos depresivos en la línea de base (*odds ratio*=1,52; IC 95%=1,05–2,20). De 11 nodos de la red de recompensas, sólo el estriado ventral derecho predijo la depresión de forma significativa. La fuerza del nodo estriatal no predijo ninguna otra psicopatología común en los adolescentes, como ansiedad, trastorno por déficit de atención e hiperactividad ni consumo de sustancias.

**Conclusiones:** La conectividad funcional aberrante del estriado ventral predice específicamente el futuro riesgo de trastorno depresivo. Este hallazgo enfatiza más la necesidad de entender cómo las redes de recompensas del cerebro contribuyen a la depresión en los jóvenes.

(*Am J Psychiatry* 2017; 174:1112–1119)
