NOVEMBER 2017 | VOLUME 174 | NUMBER 11

# The American Journal of Psychiatry

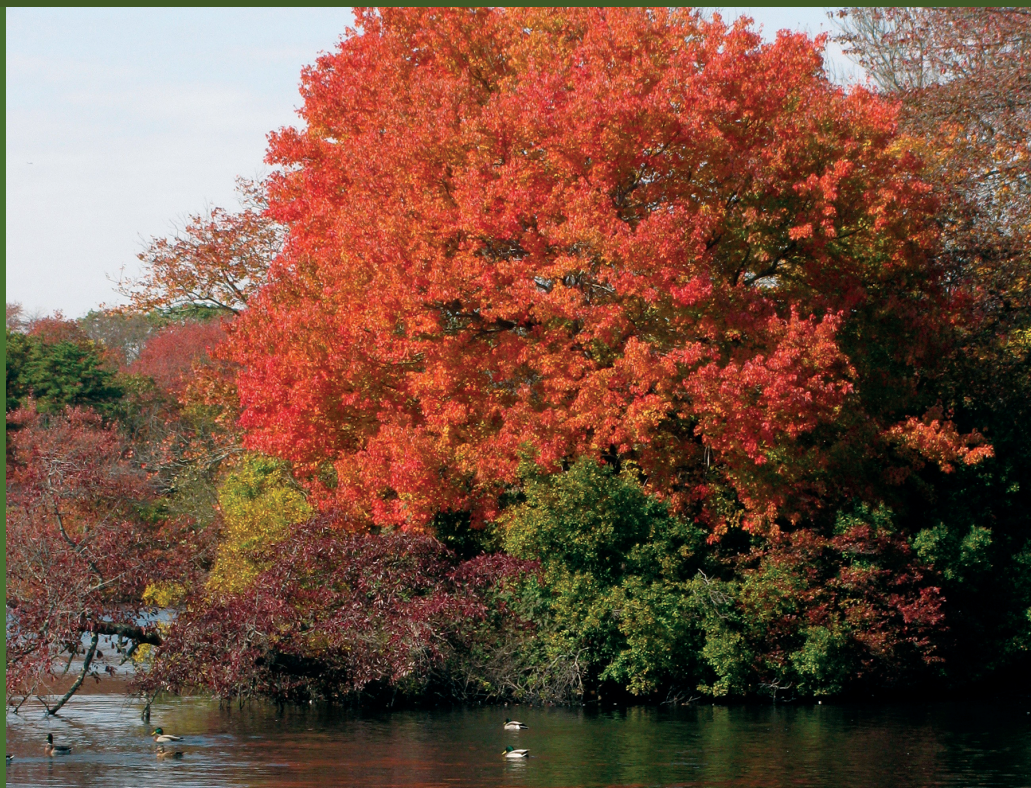

Psychosis Beyond the 22q11.2 Deletion: Do Additional  
Genetic Factors Play a Role?

Long-Term Outcomes of Psychosis: Naturalistic Follow-Up  
After Initial Hospitalization

Treatment of Bipolar Disorder in the Elderly

Vulnerability for Alcohol Use Disorder and  
Rate of Alcohol Consumption

AMERICAN  
PSYCHIATRIC  
ASSOCIATION

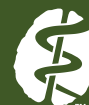

[ajp.psychiatryonline.org](http://ajp.psychiatryonline.org)
