# We've got you covered.

For over 30 years, we have provided psychiatrists with exceptional protection and personalized service. We offer comprehensive insurance coverage and superior risk management support through an "A" rated carrier.

## ANNOUNCING NEW ENHANCEMENTS TO THE AMERICAN PSYCHIATRIC ASSOCIATION PSYCHIATRISTS' PROFESSIONAL LIABILITY PROGRAM:

- **Defense Expenses related to Licensing Board Hearings and Other Proceedings:** Increased Limit to \$50,000 per proceeding with NO annual aggregate (higher limits are available up to \$150,000)
- **Fire Legal Liability Coverage:** Limit of liability increased to \$150,000 for fire damage to third party property
- **Emergency Aid Coverage:** Reimbursement up to \$15,000 in costs and expenses for medical supplies
- Insured's **Consent to Settle** is now required in the settlement of any claim – No arbitration clause!
- **First Party Assault and Battery Coverage:** Up to \$25,000 reimbursement for medical expenses related to injuries and/or personal property damage caused by a patient or client
- **Medical Payments Coverage:** Increased limit to \$100,000 for Medical Payments to a patient or client arising from bodily injury on your business premises

## IN ADDITION WE CONTINUE TO OFFER THE FOLLOWING MULTIPLE PREMIUM DISCOUNTS:

- **50% Resident-Fellow Member Discount**
- **Up to 50% New Doctor Discount** (for those who qualify)
- **50% Part Time Discount** for up to 20 client hours a week or less
- **10% New Policyholder Discount** (must be claims free for the last 6 months)
- **15% Child and Adolescent Psychiatrist Discount** for those whose patient base is more than 50% Children and Adolescents
- **10% Claims Free Discount** for those practicing 10 years, after completion of training, and remain claims free
- **5% Risk Management Discount** for 3 hours of CME

*(Above Coverage Features and Discounts are subject to individual state approval)*

Visit us at [apamalpractice.com](http://apamalpractice.com) or call **877.740.1777** to learn more.

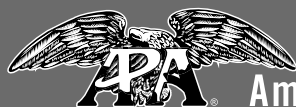

**American Professional Agency**

LEADERS IN PSYCHIATRIC MEDICAL LIABILITY INSURANCE

ENDORSED BY THE  
AMERICAN PSYCHIATRIC  
ASSOCIATION

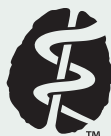

# The American Journal of Psychiatry

Official Journal of the American Psychiatric Association

## Officers 2017–2018

### President

Anita S. Everett, M.D.

### President-Elect

Altha J. Stewart, M.D.

### Treasurer

Bruce J. Schwartz, M.D.

### Secretary

Philip R. Muskin, M.D., M.A.

### Assembly

#### Speaker

Theresa M. Miskimen, M.D.

#### Speaker-Elect

James R. Batterson, M.D.

#### Recorder

Steven R. Daviss, M.D.

### Office of the CEO and Medical Director

#### CEO and Medical Director

Saul Levin, M.D., M.P.A.

### Board of Trustees

Jeffrey Akaka, M.D.

Lama Bazzi, M.D.

Renée L. Binder, M.D.

Jenny Boyer, M.D., Ph.D., J.D.

Ronald M. Burd, M.D.

Tanuja Gandhi, M.D.

Jeffrey L. Geller, M.D., M.P.H.

Uchenna B. Okoye, M.D., M.P.H.

Maria A. Oquendo, M.D., Ph.D.

Roger Peele, M.D.

Vivian B. Pender, M.D.

Paul Summergrad, M.D.

Richard F. Summers, M.D.

Ramaswamy Viswanathan, M.D., D.M.Sc.

Melinda Young, M.D.

## Editorial Board

### Editor

Robert Freedman, M.D.

### Deputy Editors

David A. Lewis, M.D.

Robert Michels, M.D.

Daniel S. Pine, M.D.

A. John Rush, M.D.

Susan K. Schultz, M.D.

Carol A. Tamminga, M.D.

### Associate Editors

Alan Brown, M.D., M.P.H.

Tyrone Cannon, Ph.D.

Benjamin G. Druss, M.D., M.P.H.

Felton Earls, M.D.

Graham J. Emslie, M.D.

Yasmin Hurd, Ph.D.

Joan L. Luby, M.D.

Constantine G. Lyketsos, M.D., M.H.S.

Helen S. Mayberg, M.D., F.R.C.P.C.

Terrie E. Moffitt, Ph.D.

Rajesh Narendran, M.D.

Roy Perlis, M.D.

Anita Thapar, M.B.B.Ch., F.R.C.Psych.,

Ph.D., F.Med.Sci.

Mauricio Tohen, M.D., Dr.PH., M.B.A.

Eduard Vieta, M.D., Ph.D.

Katherine L. Wisner, M.D., M.S.

Xin Yu, M.D.

### Editor Emerita

Nancy C. Andreasen, M.D., Ph.D.

### Former Editors

Amariah Brigham, M.D., 1844–1849

T. Romeyn Beck, M.D., 1849–1854

John P. Gray, M.D., 1854–1886

G. Alder Blumer, M.D., 1886–1894

Richard Dewey, M.D., 1894–1897

Henry M. Hurd, M.D., 1897–1904

Edward N. Brush, M.D., 1904–1931

Clarence B. Farrar, M.D., 1931–1965

Francis J. Braceland, M.D., 1965–1978

John C. Nemiah, M.D., 1978–1993

### Editorial Staff

#### Executive Editor

Michael D. Roy

#### Senior Editors

John J. Guardiano, Ph.D.

Jane Weaver

#### Production Manager

Susan Westrate

#### Assistant Editor

Angela Moore

#### Online Content Manager

Michael Pogachar

#### Editorial Support Services Manager

Heidi Koch

#### Editorial Assistant

Linda LaCour

#### Editorial Assistant/ Permissions Coordinator

Efrem Tuquabo

#### Spanish Content Manager

Sergi Casals, M.A.

#### Assistants to the Editors

Lois Lilienthal

Laura English

Rachel Hogg

Russell A. Scholl

### Interim Publisher

John McDuffie

## Subscription and Business Information

*The American Journal of Psychiatry*, ISSN 0002-953X, is published monthly by the American Psychiatric Association.

The American Psychiatric Association does not hold itself responsible for statements made in its publications by contributors or advertisers. Unless so stated, material in *The American Journal of Psychiatry* does not reflect the endorsement, official attitude, or position of the American Psychiatric Association or of the Journal's Editorial Board.

Periodicals postage paid at Arlington, VA, and additional mailing offices. POSTMASTER: Send address changes to *The American Journal of Psychiatry*, Circulation Department, American Psychiatric Association, 1000 Wilson Blvd., Suite 1825, Arlington, VA 22209-3901.

### Editorial Office

*American Journal of Psychiatry*  
American Psychiatric Association  
1000 Wilson Blvd., Suite 1825  
Arlington, VA 22209-3901  
Phone: (703) 907-7885, (703) 907-7889  
E-mail: [ajp@psych.org](mailto:ajp@psych.org)

### Customer Service

Phone: (800) 368-5777 (toll-free)  
E-mail: [appi@psych.org](mailto:appi@psych.org)

### APA Member Subscription Services

Phone: (888) 35-PSYCH (toll-free)

### Subscriptions

Per year: individual \$318.00,  
international \$478.00

Institutional subscriptions are tier priced. For institutional site license or pricing information, contact (703) 907-8538 or [institutions@psych.org](mailto:institutions@psych.org).

*Additional subscription options, including single issues and student rates*

Contact Customer Service

### Advertising

*Pharmaceutical Print and Online Advertising*  
Frank Cox, Kathleen Harrison, Tim Wolfinger  
Pharmaceutical Media, Inc.  
30 East 33rd Street  
New York, NY 10016  
Phone: (212) 904-0379  
E-mail: [twolfinger@pminy.com](mailto:twolfinger@pminy.com)

*Nonpharmaceutical and Online Sales*

Eamon Wood  
Pharmaceutical Media, Inc.  
E-mail: [ewood@pminy.com](mailto:ewood@pminy.com)  
(see address and phone above).

### Permissions and Reprints

Material published in the journals of the American Psychiatric Association and American Psychiatric Association Publishing is protected by copyright and all rights are reserved. Material may not be reproduced in any form or by any means without written permission from the copyright owner. For permission to reproduce material published by APA, please visit [http://www.appi.org/Customer\\_Service/Pages/Permissions.aspx](http://www.appi.org/Customer_Service/Pages/Permissions.aspx) for more information. Permission can also be secured through the Copyright Clearance Center ([www.copyright.com](http://www.copyright.com)).

APA does not require that permission be obtained for the photocopying of isolated articles for nonprofit classroom or library reserve use; all fees associated with such permission are waived. This consent does not extend to other kinds of copying, such as copying for general distribution, for advertising or promotional purposes, for creating new collective works, or for resale. Requests for commercial distribution should be directed to (703) 907-7889.

For bulk reprints, please contact Jane Cha, (703) 907-7889; email: [jcha@psych.org](mailto:jcha@psych.org).

Indexed in Abstracts for Social Workers, Academic Abstracts, Biological Abstracts, Chemical Abstracts, Chicago Psychoanalytic Literature Index, Cumulative Index to Nursing Literature, Excerpta Medica, Hospital Literature Index, Index Medicus, International Nursing Index, Nutrition Abstracts, Psychological Abstracts, Science Citation Index, Social Science Source, and Social Sciences Index.

Pages are produced by Sheridan Journal Services (Waterbury, VT) and printed by Sheridan NH (Hanover, NH) on acid-free paper effective with Volume 169, Number 1, January 2012.

© 2017 American Psychiatric Association.

## PERSPECTIVES

### EDITORIALS

#### 1027 Psychosis Beyond the 22q11.2 Deletion: Do Additional Genetic Factors Play a Role?

*Fernando S. Goes, M.D., Akira Sawa, M.D.*

#### 1030 Long-Term Outcomes of Psychosis: Naturalistic Follow-Up After Initial Hospitalization

*Nina R. Schooler, Ph.D.*

#### 1032 Treatment of Bipolar Disorder in the Elderly

*David L. Dunner, M.D., F.A.C.Psych.*

#### 1034 The Importance of Identifying Characteristics Underlying the Vulnerability to Develop Alcohol Use Disorder

*Ismene L. Petrakis, M.D.*

### TREATMENT IN PSYCHIATRY

#### 1036 Copy Number Variation in Syndromic Forms of Psychiatric Illness: The Emerging Value of Clinical Genetic Testing in Psychiatry

*Christian G. Bouwkamp, Ph.D., et al.* EDITORIAL • CME • AUDIO

**Clinical Guidance:** Patients with comorbid axis I psychiatric disorders, intellectual disability, congenital abnormalities, and dysmorphic features have a 24% probability of having a detectable chromosomal copy number variation (CNV). Genetic testing can verify the diagnosis and help establish the prognosis.

### PERSPECTIVES IN GLOBAL MENTAL HEALTH

#### 1051 Modern-Type Depression as an “Adjustment” Disorder in Japan: The Intersection of Collectivistic Society Encountering an Individualistic Performance-Based System

*Takahiro A. Kato, M.D., Ph.D., Shigenobu Kanba, M.D., Ph.D.*

**Clinical Guidance:** “Modern-type depression” in Japan is considered an adjustment disorder related to increasing Westernization. Patients exhibit a situation-dependent depressive state, are often absent from work, and tend to blame others. Group adaptive training is often beneficial, but antidepressants are not.

## NEW RESEARCH

### ARTICLES

#### 1054 Rare Genome-Wide Copy Number Variation and Expression of Schizophrenia in 22q11.2 Deletion Syndrome

*Anne S. Bassett, M.D., et al.* EDITORIAL

Schizophrenia risk in 22q11.2 deletion syndrome is associated with additional rare copy number variations outside the 22q11.2 deletion region, supporting a multigenic hypothesis for schizophrenia.

#### 1064 Declining Clinical Course of Psychotic Disorders Over the Two Decades Following First Hospitalization: Evidence From the Suffolk County Mental Health Project

*Roman Kotov, Ph.D., et al.* EDITORIAL • AUDIO • VIDEO

**Clinical Guidance:** Global functioning in patients with schizophrenia decreases over the 20 years following first hospitalization; worsening begins at 5–8 years. Patients with psychotic mood disorders also decline, but their baseline is higher and their decline is smaller.

Articles, continued

**1075 The 20-Year Longitudinal Trajectories of Social Functioning in Individuals With Psychotic Disorders**

*Eva Velthorst, Ph.D., et al.* EDITORIAL • CME • AUDIO

**Clinical Guidance:** Poorer social functioning in psychotic disorders is a relatively stable disability across the 20 years after first admission for psychosis, and it is associated with other unfavorable real-world outcomes. Psychotic mood disorders have better social outcomes than schizophrenia spectrum disorders.

**1086 GERI-BD: A Randomized Double-Blind Controlled Trial of Lithium and Divalproex in the Treatment of Mania in Older Patients With Bipolar Disorder**

*Robert C. Young, M.D., et al.* EDITORIAL • AUDIO

**Clinical Guidance:** Lithium and divalproex for patients age  $\geq 60$  with mania have similar, substantial efficacy and tolerability at conservative serum concentrations. Lithium was slightly more efficacious. The need for adjunctive risperidone was similar between groups, but twice as many divalproex patients required adjunctive lorazepam (20%).

**1094 Vulnerability for Alcohol Use Disorder and Rate of Alcohol Consumption**

*Joshua L. Gowin, Ph.D., et al.* EDITORIAL • CME • AUDIO • VIDEO

**Clinical Guidance:** Binge drinking may be an early indicator of vulnerability to alcohol use disorder, as young social drinkers with established alcohol disorder risk factors are more likely to binge during laboratory intravenous alcohol self-administration. Family history, male sex, and impulsivity have additive effects on the likelihood of bingeing.

**1102 Reduced Structural Connectivity in Frontostriatal White Matter Tracts in the Associative Loop in Schizophrenia**

*James J. Levitt, M.D., et al.*

Patients with chronic schizophrenia have lower structural connectivity in the striatal associative loop than healthy subjects. In healthy subjects, but not patients, worse cognitive control is predicted by reduced anatomical connectivity in the right dorsolateral prefrontal cortex–sensorimotor striatum integrative tract.

**1112 Ventral Striatum Functional Connectivity as a Predictor of Adolescent Depressive Disorder in a Longitudinal Community-Based Sample**

*Pedro Mario Pan, M.D., et al.*

Increased left ventral striatal node strength in the reward network during the resting state at age 6–12 years is associated with a 50% increase in the odds of new-onset depressive disorder 3 years later. The high node strength in the resting state may be related to the lowered response of the ventral striatum to reward, a trait that precedes depression.

COMMUNICATIONS AND UPDATES

LETTERS TO THE EDITOR

**1120 The Danger of LeDoux and Pine's Two-System Framework for Fear**

*Michael S. Fanselow, Ph.D., Zachary T. Pennington, M.A.*

**1121 Elevating the Role of Subjective Experience in the Clinic: Response to Fanselow and Pennington**

*Daniel S. Pine, M.D., Joseph E. LeDoux, Ph.D.*

**1122 Equivalence of Psychodynamic Therapy to Other Established Treatments: Limited Supporting Evidence and Clinical Relevance**

*Ioana A. Cristea, Ph.D., et al.*

**1123 Different Standards When Assessing the Evidence for Psychodynamic Therapy? Response to Cristea et al.**

*Christiane Steinert, Ph.D., et al.*

## BOOK FORUM

### 1125 Integrating Behavioral Health and Primary Care

Rachel B. Katz, M.D., Benjamin M. Cherry, M.D.

### 1126 Telepsychiatry and Health Technologies: A Guide for Mental Health Professionals

Frank W. Brown, M.D., M.B.A.

## OTHER ITEMS OF INTEREST

### 1126 Correction

### 1127 Continuing Medical Education

### A2 Subscription and Business Information

### A6 Chairpersons of APA Councils, Committees, and Task Forces

**Cover:** Autumn leaves at Belmont Lake State Park in Babylon, New York, part of Suffolk County. Two studies in this issue provide long-term data on clinical course (Kotov et al., p. 1064) and social functioning (Velthorst et al., p. 1075) in a cohort of first-admission patients with psychosis from Suffolk County followed over 20 years. (Image by Joe Trentacosti, Shutterstock.com)

Article content that addresses **Core Competencies**, defined by the Accreditation Council of Graduate Medical Education and the American Board of Medical Specialties, is indicated by the following symbols:

-  Professionalism
-  Patient Care and Procedural Skills
-  Medical Knowledge
-  Practice-Based Learning and Improvement
-  Interpersonal and Communication Skills
-  Systems-Based Practice.

More information is available at <http://www.abms.org/board-certification/a-trusted-credential/based-on-core-competencies/>

### La Tabla de Contenidos de Este Número Está Disponible en Español

*(This issue's Table of Contents are available in Spanish)  
(Abstracts are also available in Spanish)*

Translation presented in collaboration with the Office of Global Health, Rutgers-Robert Wood Johnson Medical School

Support for this effort provided by ACTA Colombia.

#### Translation courtesy of

**Sergi Casals, M.A.**

Garuna, Medellin, Colombia ([www.garunaeditors.com](http://www.garunaeditors.com))

**Carlos Lopez Jaramillo, M.D.**

Universidad de Antioquia, Medellin, Colombia

**Javier I. Escobar, M.D., M.Sc.**

Rutgers-Robert Wood Johnson Medical School

**AUDIO** Highlighted in AJP Audio, a downloadable .mp3 file available at [ajp.psychiatryonline.org](http://ajp.psychiatryonline.org)

**CME** A course covering the content of this article is available online for paid subscribers to the AJP CME Course program

**EDITORIAL** Discussed in one of the issue's editorials

**VIDEO** Highlighted online by Deputy Editor Daniel S. Pine, M.D.

# THE AMERICAN PSYCHIATRIC ASSOCIATION

1000 Wilson Blvd., Suite 1825, Arlington, VA 22209-3901  
(888) 357-7924 (toll-free inside the U.S. and Canada) / (703) 907-7300  
web site: [www.psychiatry.org](http://www.psychiatry.org) • e-mail: [apa@psych.org](mailto:apa@psych.org)

## Chairpersons of Councils, Committees, and Task Forces

### Standing Committees

|                             |                               |
|-----------------------------|-------------------------------|
| <b>Bylaws</b>               | Esperanza Diaz, M.D.          |
| <b>Elections</b>            | Barry K. Herman, M.D.         |
| <b>Ethics</b>               | Ezra Griffith, M.D.           |
| <b>Finance and Budget</b>   | Alan F. Schatzberg, M.D.      |
| <i>Audit</i>                | Bruce J. Schwartz, M.D.       |
| <i>Investment Oversight</i> | David Fassler, M.D.           |
| <b>Joint Reference</b>      | Altha J. Stewart, M.D.        |
| <b>Membership</b>           | Rahn K. Bailey, M.D.          |
| <b>Nominating</b>           | Maria A. Oquendo, M.D., Ph.D. |
| <b>Tellers</b>              | Jose Vito, M.D.               |

### Non-Standing Committee

|                             |                              |
|-----------------------------|------------------------------|
| <b>Conflict of Interest</b> | Philip R. Muskin, M.D., M.A. |
|-----------------------------|------------------------------|

### Councils

#### Council on Addiction Psychiatry

Andrew J. Saxon, M.D.

#### Council on Advocacy and Government Relations

Patrick S. Runnels, M.D.

*Advocacy and Litigation Funding*

Bhasker J. Dave, M.D.

#### Council on Children, Adolescents, and Their Families

Joseph V. Penn, M.D.

#### Council on Communications

Christopher A. (Drew) Ramsey, M.D.

#### Council on Geriatric Psychiatry

Robert P. Roca, M.D.

#### Council on Healthcare Systems and Financing

Harsh K. Trivedi, M.D.

*Integrated Care*

Lori E. Raney, M.D.

*Reimbursement for Psychiatric Care*

Laurence Miller, M.D.

*RBRVS, Codes and Reimbursement*

Gregory G. Harris, M.D.

*Telepsychiatry*

James H. Shore, M.D.

#### Council on International Psychiatry

Bernardo Ng, M.D.

#### Council on Medical Education and Lifelong Learning

Mark H. Rapaport, M.D.

*Scientific Program*

Linda Worley, M.D.

*Vestermark Award Committee*

Lowell D. Tong, M.D.

#### Council on Minority Mental Health and Health Disparities

Christina V. Mangurian, M.D.

#### Council on Psychiatry and Law

Debra A. Pinals, M.D.

*Judicial Action*

Marvin S. Swartz, M.D.

#### Council on Psychosomatic Medicine (Consultation Liaison Psychiatry)

David F. Gitlin, M.D.

#### Council on Quality Care

Grayson Norquist, M.D.

*Mental Health Information Technology*

Brent Nelson, M.D.

*Performance Measures*

Karen Pierce, M.D.

*Practice Guidelines*

Michael J. Vergare, M.D.

#### Council on Research

Dwight L. Evans, M.D.

*Psychiatric Dimensions of Disasters*

Robert J. Ursano, M.D.

# The Residents' JOURNAL

## The American Journal of Psychiatry Residents' Journal

October 2017

Volume 12

Issue 10

### Inside

- 2 Mental Health and the Juvenile Justice System: Where Has History Taken Us?**  
Divya Kiran Chhabra, M.D.  
*Emphasizing the importance of mental health screening, assessment, and treatment in this population.*
- 4 Misdiagnosis or Comorbidity: Borderline Personality Disorder in a Patient Diagnosed With Bipolar Disorder**  
Nicole Peterson Scott, M.D.  
*Considering the two disorders as separate diagnoses that can occur together and the theorized relationship between them.*
- 6 Team Building as an Improved Approach to Residency Rotations**  
Elizabeth Potter, D.O., Ph.D.  
*Endorsing approaches like fair division of labor, cooperating with other services, effective communication, and self-improvement.*
- 7 Confronting Despair on the Long-Term Care Unit**  
Dara Wilensky, M.D.  
*Commentary on the somber experience of witnessing a geriatric patient's self-retrospection.*
- 8 Exploring Humanism in Medicine: Reflection Rounds With Medical Students and Residents**  
Dan Janiczak, M.D.  
*Conveying the need for reflection practices in mainstream clerkship education.*
- 9 The Accountant: A Cinematic Take on Autism Spectrum Disorder**  
Reviewed by Somya Abubucker, M.D.
- 10 Residents' Resources**

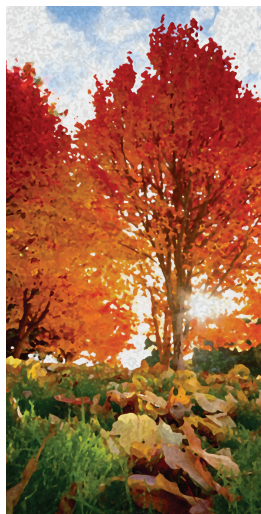

© Shutterstock.com

**ASSOCIATE EDITORS**  
Erin Fulchiero, M.D.  
Helena Winston, M.D.

**MEDIA EDITOR**  
Shawn E. McNeil, M.D.

**CULTURE EDITOR**  
Michelle Liu, M.D.

**STAFF EDITOR**  
Angela Moore

**EDITOR-IN-CHIEF**  
Rachel Katz, M.D.

**SENIOR DEPUTY EDITOR**  
Oliver Glass, M.D.

**DEPUTY EDITOR**  
Anna Kim, M.D.

**EDITORS EMERITI**  
Katherine Pier, M.D.  
Rajiv Radhakrishnan, M.B.B.S., M.D.  
Misty Richards, M.D., M.S.  
Arshya Vahabzadeh, M.D.  
Monifa Seawell, M.D.  
Sarah M. Fayad, M.D.  
Joseph M. Cerimele, M.D.  
Molly McVoy, M.D.  
Sarah B. Johnson, M.D.

**Editor-in-Chief**  
Rachel Katz, M.D.  
**Senior Deputy Editor**  
Oliver Glass, M.D.  
**Deputy Editor**  
Anna Kim, M.D.  
**Associate Editors**  
Erin Fulchiero, M.D.  
Helena Winston, M.D.

The *Residents' Journal*, the largest and most robust resident-led journal in the house of medicine, is an e-publication that serves as a forum to share your ideas and experiences in training, clinical practice, research, and careers with your colleagues.

To submit a manuscript, please visit [mc.manuscriptcentral.com/appi-ajp](http://mc.manuscriptcentral.com/appi-ajp) and select a manuscript type for AJP Residents' Journal. You may submit a commentary (500 words), book review (500 words), history of psychiatry (500 words), clinical case conference (1,250 words), review article (1,500 words), treatment in psychiatry article (1,500 words), research article (1,250 words), drug review (1,500 words), or letter to the editor (250 words).

If you are interested in serving as a Guest Section Editor for the *Residents' Journal*, please send your CV, and your ideas for topics, to the Editor-in-Chief ([rachel.katz@yale.edu](mailto:rachel.katz@yale.edu)).

To access the complete Residents' Journal archives, visit [ajp.psychiatryonline.org/loi/ajp-rj](http://ajp.psychiatryonline.org/loi/ajp-rj)



# Go Online

Visit [ajp.psychiatryonline.org](http://ajp.psychiatryonline.org) for these features!

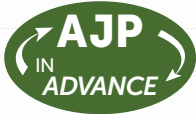

## AJP in Advance

*Discover the latest research advances before they appear in print*

### **PTSD Psychotherapy Outcome Predicted by Brain Activation During Emotional Reactivity and Regulation**

In one of two linked studies, authors compared brain function and treatment outcome in patients with PTSD randomized to exposure therapy or a waitlist condition. A combination of baseline functional brain measures during emotional reactivity and regulation predicted response to exposure therapy in patients with PTSD.

### **Selective Effects of Psychotherapy on Frontopolar Cortical Function in PTSD**

In the second of two linked studies, exposure therapy for PTSD was followed by increased frontopolar function and connectivity with the ventromedial prefrontal cortex/ventral striatum during cognitive reappraisal of negative images. The increase in frontopolar activation was associated with improvement in hyperarousal and psychological well-being.

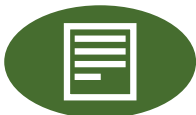

## AJP CME

*Earn CME credit: 3 courses per issue*

This month's courses appear on pages 1127–1130. Each short course is based on one article in this issue and can earn up to 1 *AMA PRA Category 1 Credit*<sup>™</sup>. CME credit is issued only **online**, and a paid subscription to AJP's CME course program is required.

Visit [psychiatryonline.org/cme](http://psychiatryonline.org/cme) and click on the "American Journal of Psychiatry" tab.

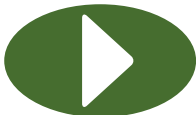

## AJP Multimedia

*Access Audio or Video for highlights of each issue*

In AJP Audio this month, Deputy Editor Susan K. Schultz, M.D., discusses clinical genetic testing in psychiatry, binge drinking as a possible risk factor for alcohol use disorder, lithium versus divalproex for bipolar disorder in the elderly, the course of schizophrenia over the first 20 years, as well as trajectories of social functioning over 20 years.

In this month's video, Deputy Editor Daniel S. Pine, M.D., discusses the articles "Declining Clinical Course of Psychotic Disorders Over the Two Decades Following First Hospitalization: Evidence From the Suffolk County Mental Health Project" and "Vulnerability for Alcohol Use Disorder and Rate of Alcohol Consumption."

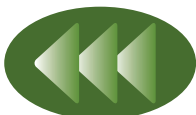

## History of Psychiatry

*Revisit the field's rich history through the pages of AJP*

### **50 years ago this month: "Mass Murder: The Wagner Case"**

In the November 1967 issue, Dr. Hilde Bruch revisits the case of Ernst August Wagner, who in 1913 shot 25 people, killing 14 of them, including his wife and four children. Wagner's case was "considered a classic in the German psychiatric literature," and in the wake of the University of Texas tower shooting in August 1966, in which 18 people were killed, the Wagner case was revived in the German press. "Certain similarities can be recognized," Dr. Bruch observes: "seemingly well-functioning, intelligent, and ambitious men, leading exemplary middle-class lives, had quietly accumulated arsenals of weapons, practiced sharpshooting, and had made many other arrangements for carefully planned mass murders."

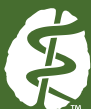

Source: https://ajp.psychiatryonline.org/doi/suppl/10.1176/ajp.2017.174.issue-11/suppl_file/front.pdf
