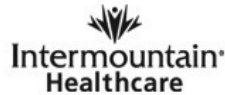

*Helping People Live the Healthiest Lives Possible.*

**Psychiatrists (adult and child), & Emergency-Access Center are currently needed in:**

Bountiful • Ogden • Park City  
Salt Lake City • St. George

**Medical Director/Department Chair & Emergency-Access Center needed in:**  
Salt Lake City

Employment with Intermountain Medical Group. Competitive salary with transition to production and additional income for meeting quality goals. Stipend available. Signing bonus and loan repayment available. Full Intermountain benefits to include defined pension, 401k match & CME. Relocation provided up to 15K.

For the second year in a row, Forbes magazine has named Intermountain one of the top 3 healthcare organizations, a top 25 employer overall.

Contact Intermountain Physician Recruiting.  
800-888-3134 [PhysicianRecruit@imail.org](mailto:PhysicianRecruit@imail.org)  
<http://physicianjobsintermountain.org>

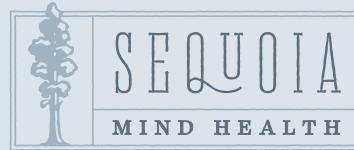

## *Learn how to administer ketamine for psychiatric disorders!*

Taught by a UCSF-trained psychiatrist, this one-day course will teach students how to safely administer ketamine for the treatment of psychiatric disorders, as well as observe actual treatments on live patients. Upon completion students will have the knowledge base, comfort and evidence-based protocol required to integrate this treatment into an outpatient practice.

The course is taught at the offices of Sequoia Mind Health in beautiful Northern California wine country, approximately 1 hour north of San Francisco.

PLEASE VISIT THE "COURSES" TAB ON OUR WEBSITE:

[www.sequoiamindhealth.com](http://www.sequoiamindhealth.com)

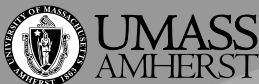

## **Assistant Director for Psychiatric Services**

The Center for Counseling and Psychological Health at the University of Massachusetts Amherst is seeking a full time Assistant Director for Psychiatric Services.

Under the general direction of the Director, Center for Counseling and Psychological Health (CCPH), the Assistant Director is responsible for leadership in provision of psychiatric services at CCPH. Provides direct evaluation and treatment of a wide range of patients presenting to clinic; participates in preventive mental health programs as a consultant and leader of workshops. Provides specialized services as a psychiatrist with evaluations and care of patients relevant to medications and medical illness; makes decisions concerning hospitalizations and monitoring therein; decisions concerning medical withdrawals and re-admissions. Crisis/liaison services, including regular intervention with emergency situations and highly acute patient situations. Supervision of advanced practice psychiatric clinical nurse specialists, as well as other CCPH psychiatrists.

**Minimum Qualifications:** MD degree and at least 3 years of residency training in psychiatry, including skills specifically relevant to this setting; board certification or eligibility in psychiatry (certification required within 3 years of hiring); medical license in state of Massachusetts; registration with DEA; on-call responsibility requires after-hours time.

Salary commensurate with skills and experience, plus excellent benefit package.

Applicants must apply online at:

<http://umass.interviewexchange.com/jobofferdetails.jsp?JOBID=89340> and submit a cover letter, resume and contact information for 3 professional references (reference letters will be requested at a later step in the process). Review of resumes will begin on October 23, 2017, and will continue until the position is filled.

*The University of Massachusetts Amherst is an Affirmative Action/Equal Opportunity Employer of women, minorities, protected veterans, and individuals with disabilities and encourages applications from these and other protected group members.*

## **Psychiatrist Opportunities** Philadelphia, PA

Einstein Behavioral Health is a comprehensive treatment facility in Philadelphia, Pennsylvania. We are seeking:

- Medical Director, Behavioral Health Service
- FT Psychiatrist for General Adult Inpatient Psychiatry Unit
- Geropsychiatrist
- CRC Medical Director

Our programs offer a full range of adult inpatient mental health services, including an alcohol and chemical dependency treatment unit and a geriatric diagnostic center. Our full continuum of care also includes intensive outpatient programs, partial hospitalization programs and an outpatient medication management clinic.

This opportunity includes an innovative, competitive compensation model and an excellent working environment as a member of a large, experienced behavioral medicine team.

Einstein Behavioral Health offers programs to address behavioral health issues for all ages. Our 36-bed Long Term Structured Residence (LTSR) services both adults and older adults, and our Adult Crisis Response Center (CRC) is a crisis/emergency psychiatry facility. Our Child and Adolescent Crisis Response Center includes a full range of services for children and adolescents.

We are part of Einstein Healthcare Network, a large, comprehensive healthcare network, and have a long history of providing excellent patient care and a high level of physician satisfaction.

For more information, please contact  
**Kim Hannan, Physician Recruiter,**  
[HannanKi@einstein.edu](mailto:HannanKi@einstein.edu) or call  
**267-421-7435.**

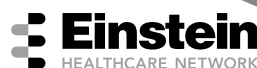

EOE

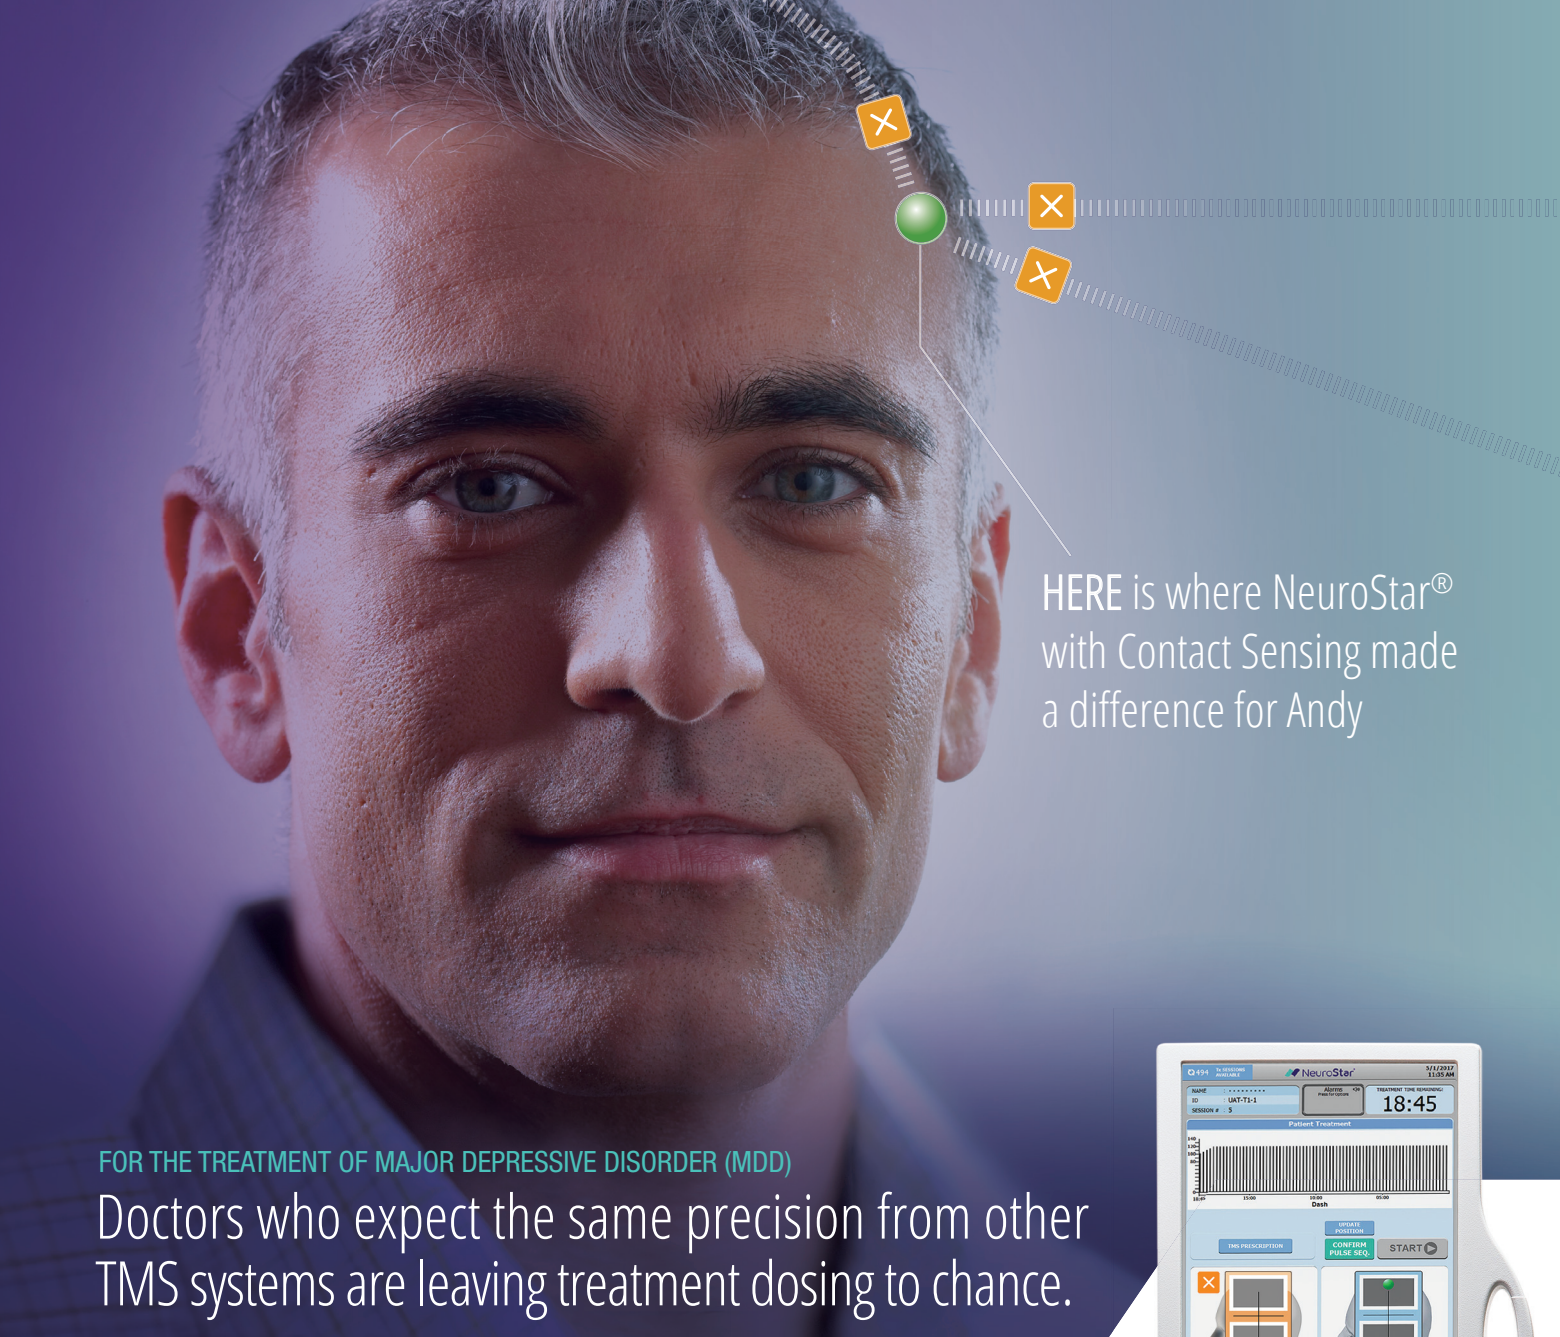

HERE is where NeuroStar<sup>®</sup> with Contact Sensing made a difference for Andy

**FOR THE TREATMENT OF MAJOR DEPRESSIVE DISORDER (MDD)**

Doctors who expect the same precision from other TMS systems are leaving treatment dosing to chance.

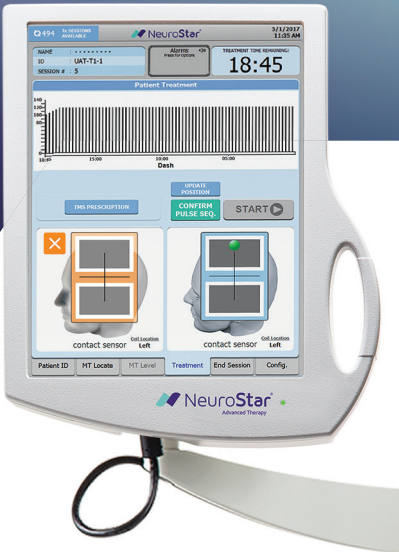

When contact with the head is off by just 1 mm, as much as a 40% loss in the prescribed TMS dose can occur.<sup>1</sup> **Only NeuroStar Advanced Therapy** with Contact Sensing precisely monitors treatment delivery in 3 dimensions and alerts the clinician if the coil loses contact, ensuring that the full dose is being administered.

**When remission from MDD is at stake, precision matters. Trust the #1 TMS choice of doctors like you.**

**INDICATION**

NeuroStar<sup>®</sup> is indicated for the treatment of Major Depressive Disorder in adult patients who have failed to receive satisfactory improvement from prior antidepressant medication in the current episode.

**IMPORTANT INFORMATION**

The most common side effect is pain or discomfort at or near the treatment site. These events are transient; they occur during the TMS treatment course

and do not occur for most patients after the first week of treatment. NeuroStar Advanced Therapy should not be used with patients who have non-removable conductive metal in or near the head.

NeuroStar Advanced Therapy is available by prescription only. Please visit [NeuroStar.com](http://NeuroStar.com) for full safety and prescribing information.

**Reference:** 1. Neuronetics, Inc., Data on file.

**NeuroStar.com**  
**1-877-600-7555**

**RIGHT DOSE. RIGHT LOCATION.**  
**EVERY TIME.**

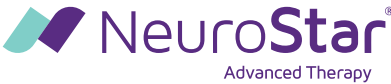

Source: https://psychiatryonline.org/doi/suppl/10.1176/ajp.2017.174.issue-11/suppl_file/back.pdf
